# Supplementary material
Source: MDPI journal article supplement (https://www.mdpi.com/1999-4907/7/8/181)
Supplement: s1 [file s1]

## Supplementary Materials: C Stocks in Forest Floor and Mineral Soil of Two Mediterranean Beech Forests

Anna De Marco, Antonietta Fioretto, Maria Giordano, Michele Innangi, Cristina Menta, Stefania Papa and Amalia Virzo De Santo

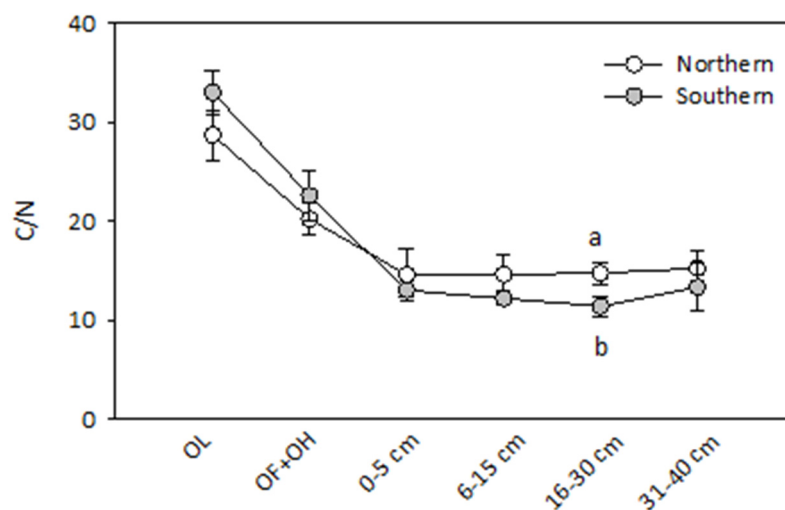

**Figure S1.** C/N ratios on the forest floor–mineral soil continuum of a northern and a southern beech forest. Values for forest floor are means  $\pm$  standard error of 36 samples (6 sampling plots, 2 sampling seasons, 3 replicate analyses); different lower-case letters indicate significant differences between sites (*t*-test; overall significance level = 0.05).

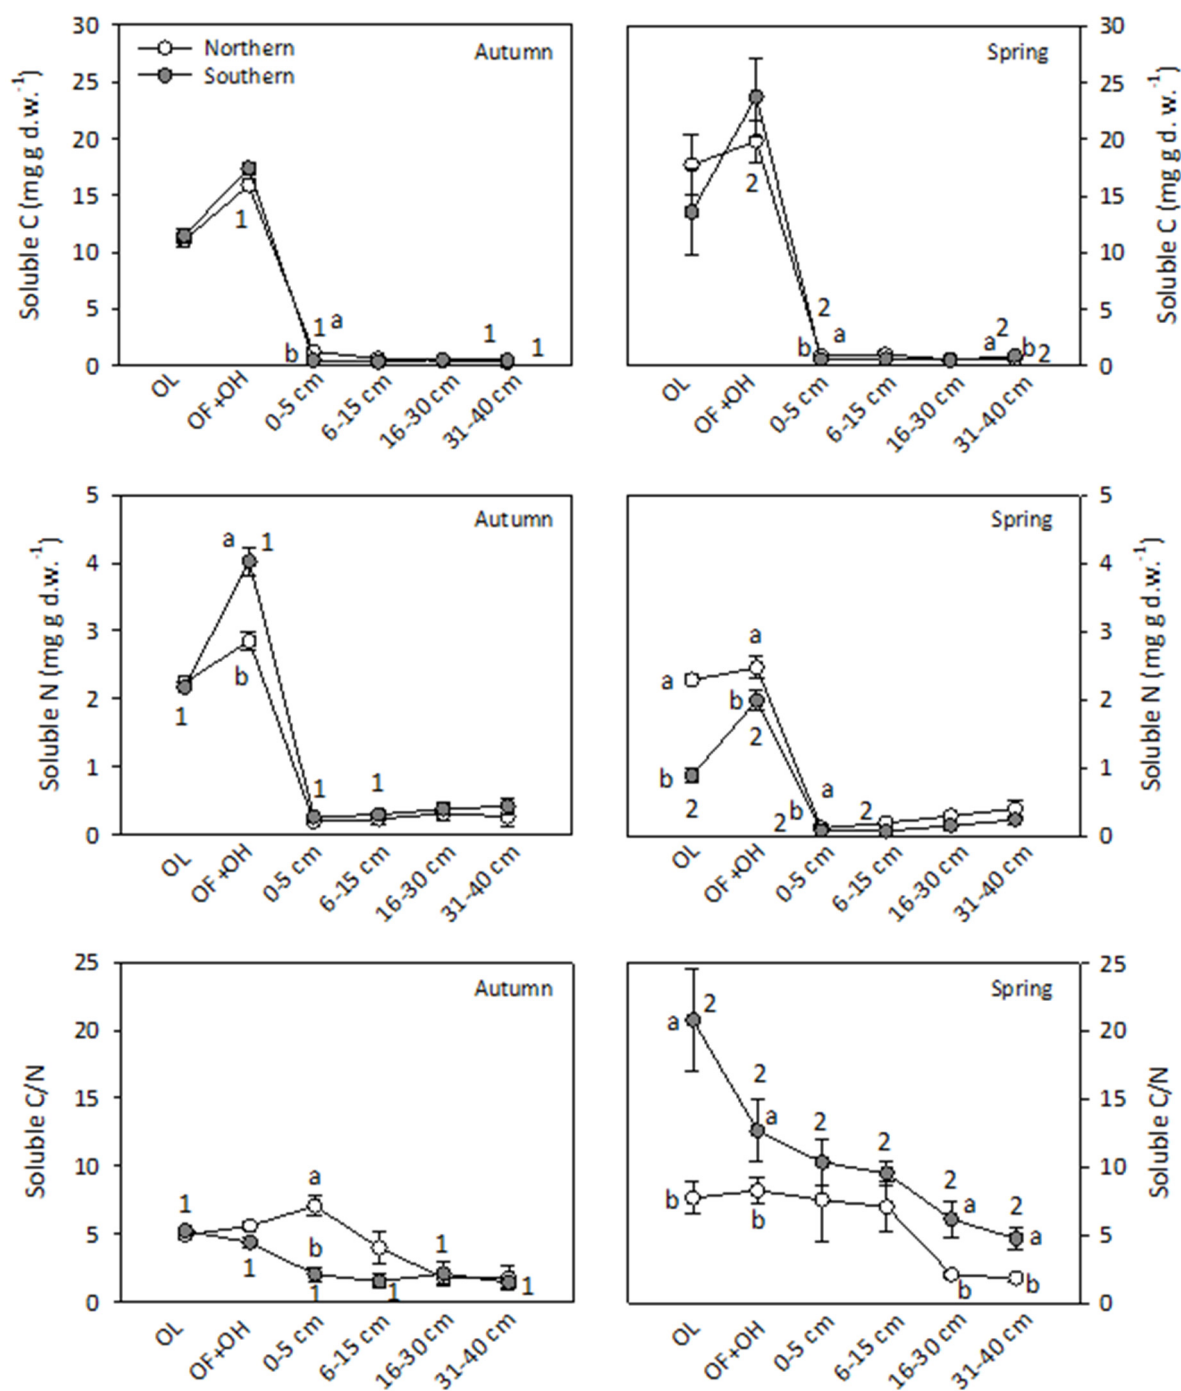

**Figure S2.** Concentrations of water-extractable C and N, and C/N ratios for water-extractable fractions on the forest floor–mineral soil continuum of a northern and a southern beech forest in autumn and in spring. Values are means  $\pm$  standard error of 18 samples (6 sampling plots, 3 replicate analyses). Different lower-case letters indicate significant differences between sites; differences between seasons are indicated by different numbers (two-way ANOVA followed by post-hoc Holm-Šidák method; overall significance level = 0.05).

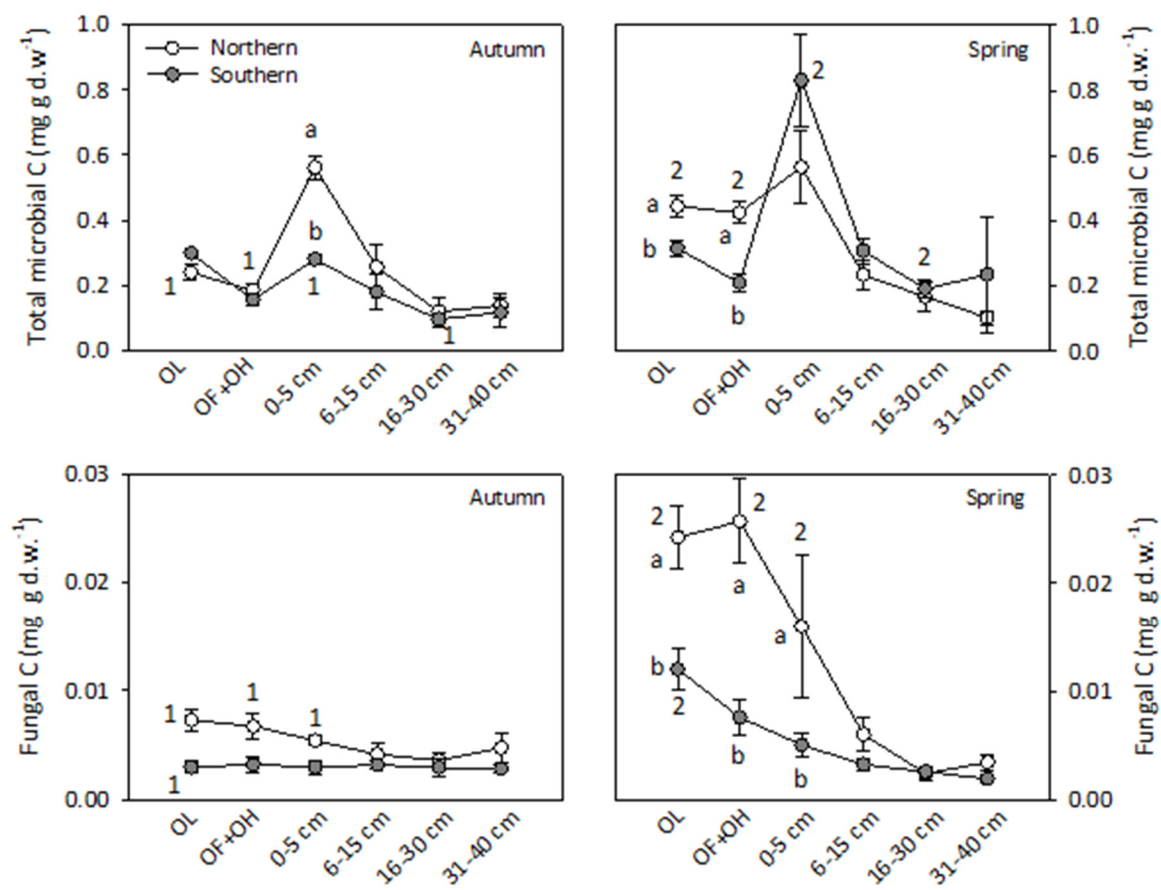

**Figure S3.** Concentrations of microbial and fungal C on the forest floor–mineral soil continuum of a northern and a southern beech forest in autumn and in spring. Values are means  $\pm$  standard error of 18 samples (6 sampling plots, 3 replicate analyses). Different lower-case letters indicate significant differences between sites; differences between seasons are indicated by different numbers (two-way ANOVA followed by post-hoc Holm-Šídák method; overall significance level = 0.05).
